# Supplementary material for: Macrophage programming is regulated by a cooperative interaction between fatty acid binding protein 5 and peroxisome proliferator‐activated receptor γ
Source: PubMed Central journal article supplement — FASEB J. 2022 Apr 18;36(5):e22300. doi: 10.1096/fj.202200128R (PMC9320869; doi:10.1096/fj.202200128r), 2022-04-18
Supplement: FSB2-36-0-s001.pdf [file FSB2-36-0-s001.pdf]

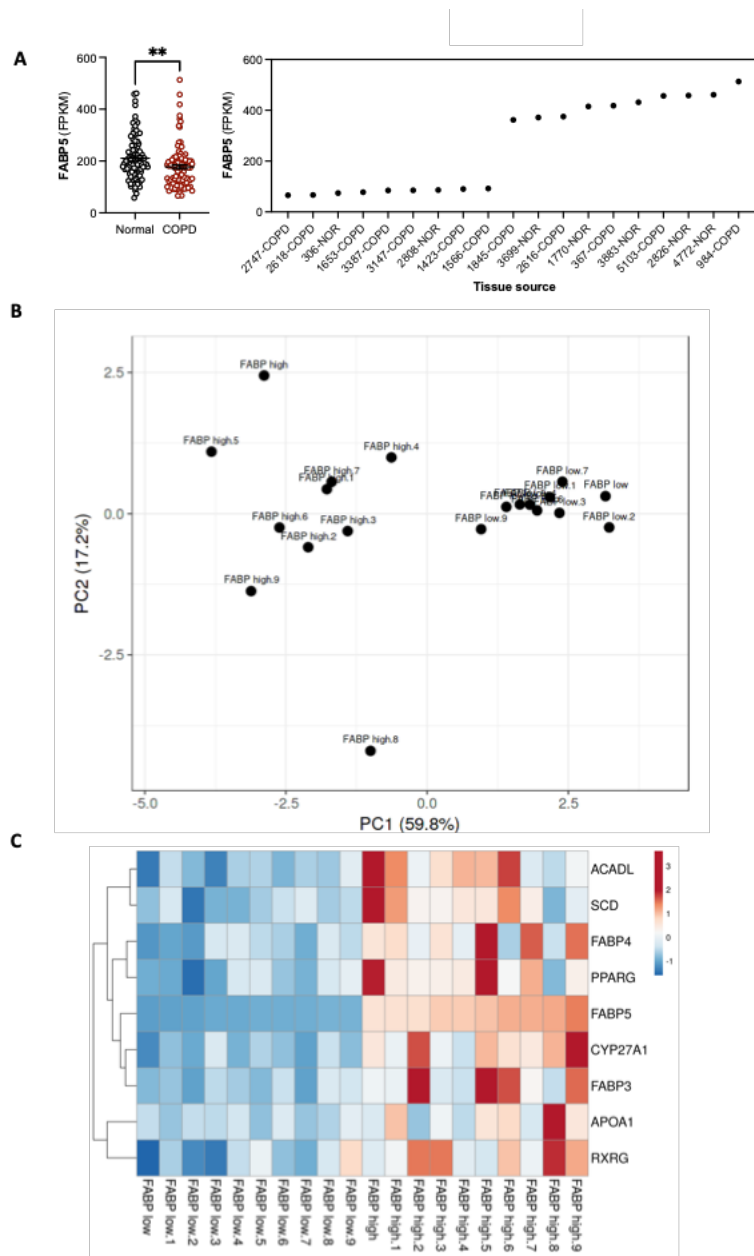

**Suppl. Fig. 1 Segregation of samples into two groups based on *FABP5* mRNA levels from RNA-seq data available in the NCBI Gene Expression Omnibus (GEO Accession #GSE57148) from a study examining lung tissues of healthy and COPD patients [27]. **A.** Expression levels of *FABP5* in all samples (left) indicating that overall *FABP5* is decreased in COPD and in selected 10 lowest (*FABP5*<sup>low</sup>) and 10 highest (*FABP5*<sup>high</sup>) (right) as FPKM: fragments per kilobase of exon per million fragments mapped between subjects with normal lung function (NOR) and COPD subjects. \*\* p<0.01. **B.** Principle Components Analysis (PCA) of gene transcription indicates**

significant separation by FABP5 expression level. **C.** Gene expression heatmap of PPAR signaling pathway genes from FABP5<sup>high</sup> and FABP5<sup>low</sup> human lung samples identified by KEGG pathway analysis.

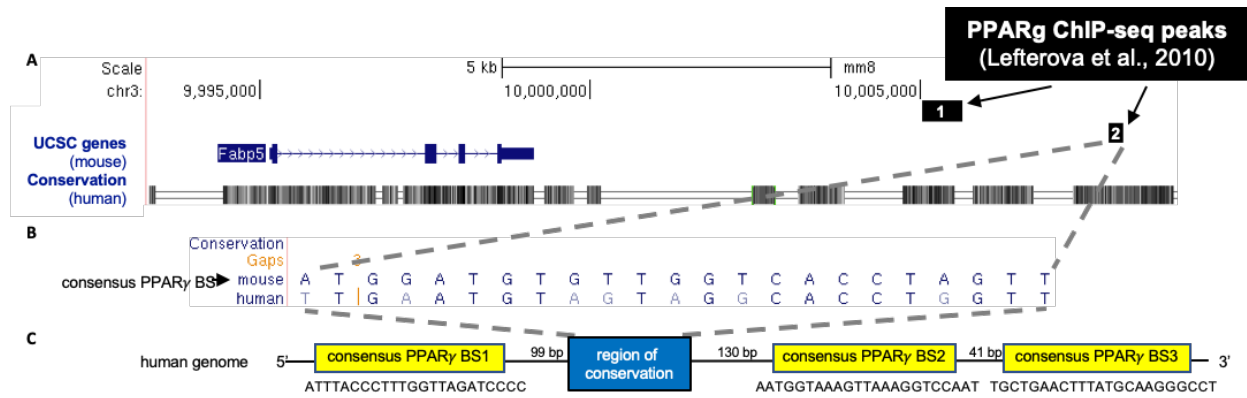

**Suppl. Fig. 2 Evidence for direct transcriptional regulation of FABP5 by PPAR $\gamma$ .** **A.** PPAR $\gamma$  ChIP-seq peaks, shown as black boxes, were identified within 10 kb downstream of the *Fabp5* coding region. **B.** Conservation of PPAR $\gamma$  ChIP-seq peak 2 between mouse and human genomes. **C.** Three PPAR $\gamma$  binding sites (BS, indicated by yellow boxes) were found within ~200 bp of the region of conservation (indicated by blue box) between mouse and human genomes.

**Suppl. Table 1. Antibody list used for Western blot and Immunofluorescence.**

| <b>Antibody</b>                              | <b>Application</b>                           | <b>Source</b>  | <b>Identifier</b> |
|----------------------------------------------|----------------------------------------------|----------------|-------------------|
| Monoclonal anti-Flag (R) M2-Peroxidase (HRP) | Western blot, primary<br>No secondary needed | Sigma          | Cat# A8592        |
| Rabbit anti-Myc-Tag                          | Western blot, primary                        | Cell Signaling | Cat# 2272S        |
| Rat anti-Human FABP5/E-FABP                  | Western blot & Immunofluorescence, primary   | R&D            | MAB3077           |
| Goat anti-Rabbit HRP                         | Western blot, secondary                      | Zymax          | Cat# 81-6120      |
| Goat anti-Rat IgG(H+L) HRP                   | Western blot, secondary                      | Pierce         | Cat# 31470        |
| Goat anti-Mouse Fabp5/e-fabp                 | Immunofluorescence, primary                  | R&D            | AF1476            |
| Rabbit anti-PPAR $\gamma$                    | Immunofluorescence, primary                  | Cell Signaling | Cat# 2443         |
| Mouse IgG1 anti-CD68                         | Immunofluorescence, primary                  | Abcam          | ab955             |
| Goat anti-Rabbit IgG, Alexa Fluor 488        | Immunofluorescence, secondary                | Invitrogen     | A-11008           |
| Goat anti-Rat IgG, Alexa Fluor 568           | Immunofluorescence, secondary                | Invitrogen     | A-11077           |
| Rabbit anti-Goat IgG, Alexa Fluor 568        | Immunofluorescence, secondary                | Invitrogen     | A-11079           |
| Donkey anti-Mouse IgG1, Alexa Fluor 647      | Immunofluorescence, secondary                | Invitrogen     | A-32787           |

**Suppl. Table 2. CHIP-qPCR primer sequences.**

|                       | <b>Forward Sequence (5' to 3')</b> | <b>Reverse Sequence (3' to 5')</b> |
|-----------------------|------------------------------------|------------------------------------|
| Binding Site 1 (BS1)  | AATATTTACCCCTTTGGTTAGATCCC         | CTTTGTGAAGCCAGCTTTGT               |
| Binding Site 2 (BS2)  | GGGAGATGTTTGTCTAAAGTTAATCC         | GTTTCAGCAATGAGAAAGAGCAAA           |
| Binding Site 3 (BS3)  | GCTCTTTCTCATTGCTGAACCTTAT          | CACTCCGGTGACAGTAAGAATG             |
| Positive Control (PC) | GGGTTTGAAGCAAAGGGAAG               | GTCATCCTGCCTCCATTCTT               |
